# Supplementary material for: The role of emissive charge transfer states in two polymer–fullerene organic photovoltaic blends: tuning charge photogeneration through the use of processing additives
Source: Royal Society of Chemistry journal article supplement (doi:10.1039/c4ta02244k), 2014-01-01
Supplement: c4ta02244k1.pdf [file c4ta02244k1.pdf]

## Supporting Information

### The role of emissive charge transfer states in two polymer/fullerene organic photovoltaic blends: tuning charge photogeneration through the use of processing additives

Tracey M. Clarke, Jeff Peet, Christoph Lungenschmied, Nicolas Drolet, Xinhui Lu, Benjamin Ocko, Attila J. Mozer, and Maria Antonietta Loi

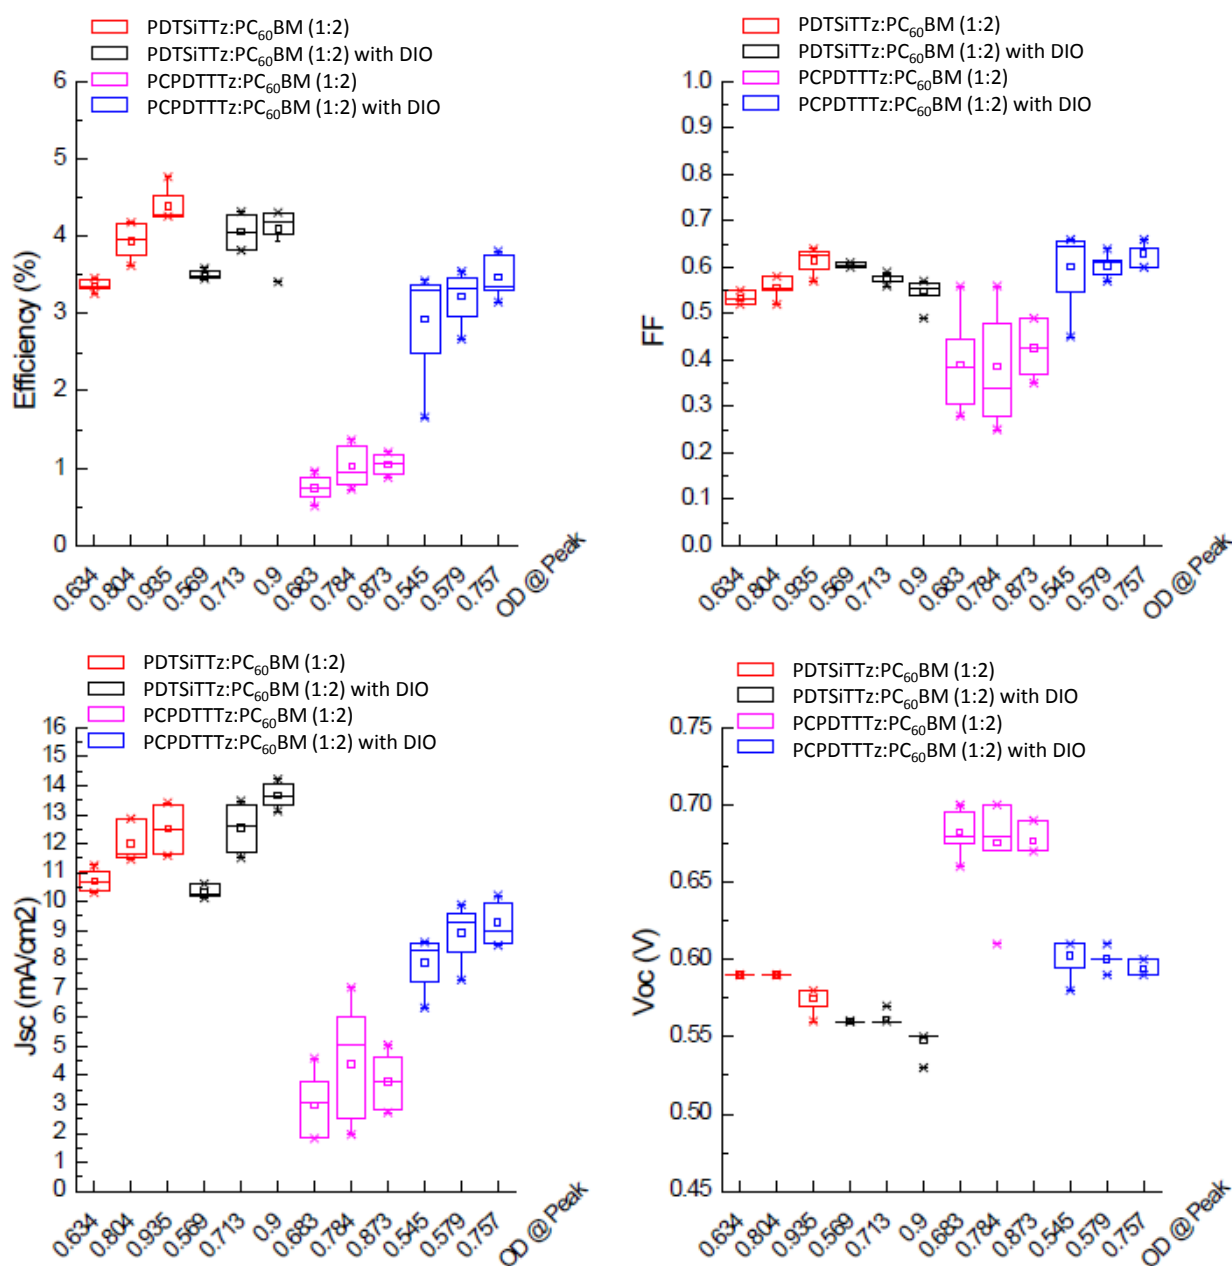

**Figure S1.** Summary of device data for PCPDTTTz:PCBM and PDTSiTTz:PCBM, showing average efficiency, FF, J<sub>sc</sub> and V<sub>oc</sub> over several devices of differing optical density (OD).

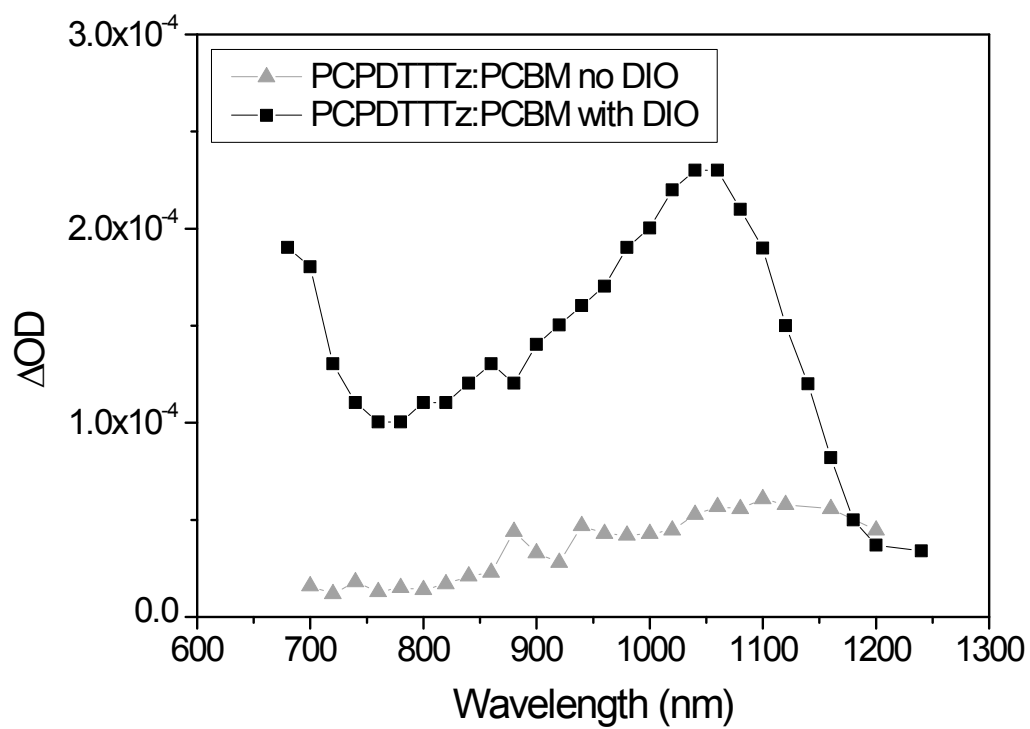

**Figure S2.** Transient absorption spectra of PCPDTTTz:PCBM blend films measured with and without DIO.

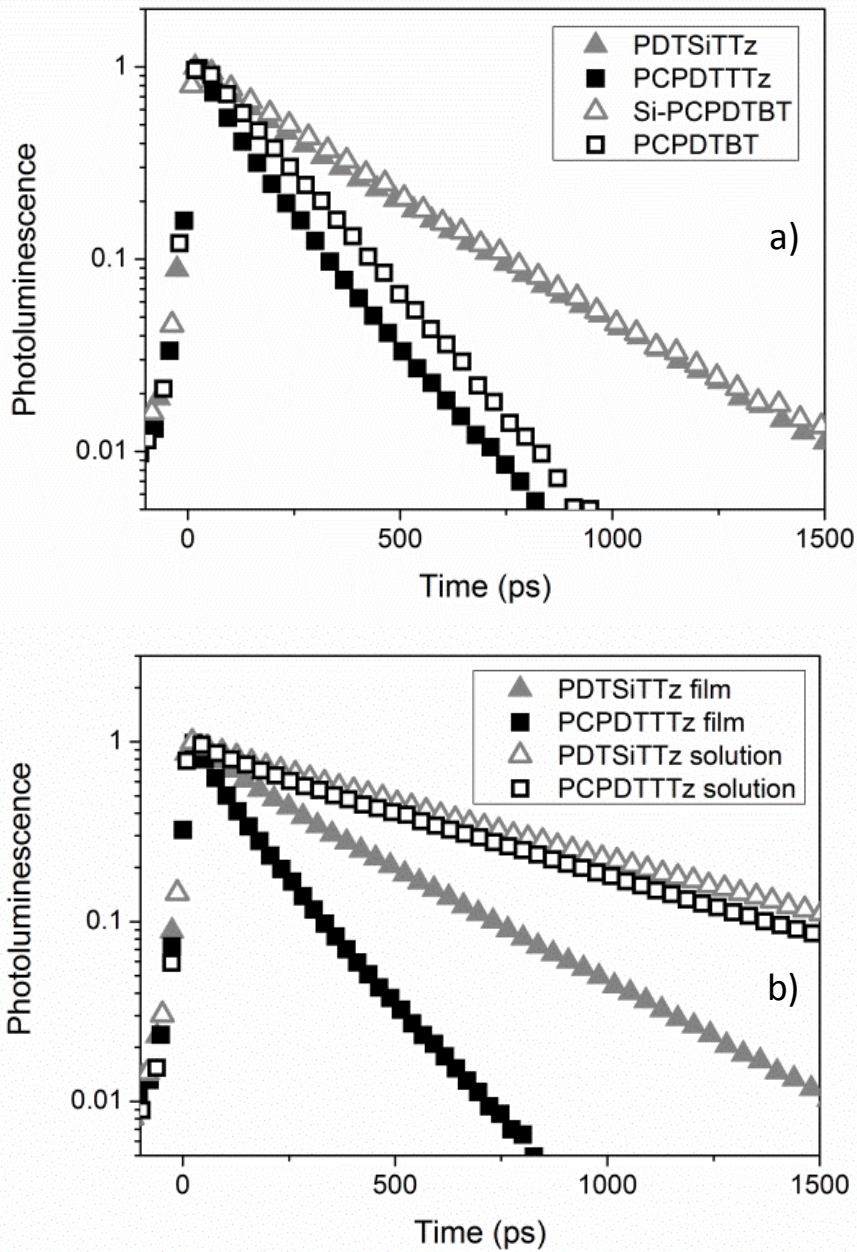

**Figure S3.** The photoluminescence decays in the 670-700 nm spectral range for pristine PDTSiTTz and PCPD TTTz films as compared to solutions in o-dichlorobenzene (a). The photoluminescence decays with time for pristine PDTSiTTz and PCPD TTTz (on encapsulated quartz) measured in the spectral range at the emission maximum of 670 – 700 nm, compared to PCPD TBT and Si-PCPD TBT (on encapsulated glass) (b).

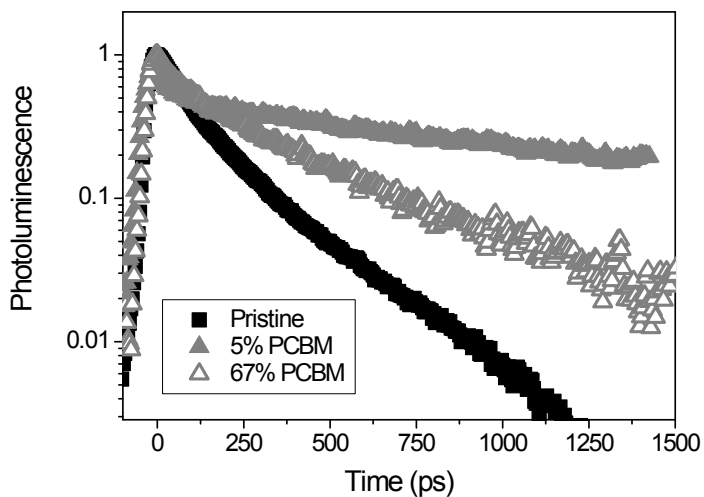

**Figure S4.** The photoluminescence decays with time for pristine PCPDTTz and blends with PCBM, varying the weight percentage of PCBM and measuring in the spectral range of 1000-1100 nm (c).

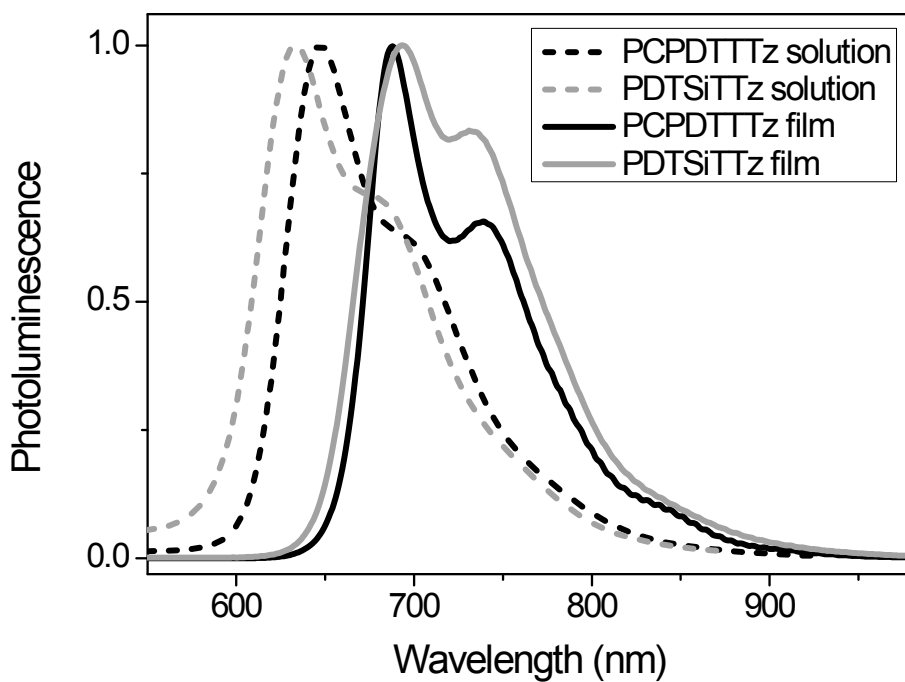

**Figure S5.** Steady-state absorption spectra of pristine PCPDTTz and PDTSiTTZ solutions (o-DCB) and thin films.
